# Supplementary material for: The effect of single atom replacement on organic thin film transistors: case of thieno[3,2-b]pyrrole vs. furo[3,2-b]pyrrole
Source: Royal Society of Chemistry journal article supplement (doi:10.1039/c8tc02887g), 2018-01-01
Supplement: c8tc02887g1.pdf [file c8tc02887g1.pdf]

Supporting Information

**The Effect of Single Atom Replacement on Organic Thin Film Transistors: Case of Thieno[3,2-*b*]pyrrole vs Furo[3,2-*b*]pyrrole**

*Chandima Bulumulla,<sup>a</sup> Ruwan Gunawardhana,<sup>a</sup> Sang Ha Yoo,<sup>c</sup> Cody R. Mills,<sup>a</sup> Ruvanthi N. Kularatne,<sup>a</sup> Thomas N. Jackson,<sup>d</sup> Michael C. Biewer,<sup>a</sup> Enrique D. Gomez,<sup>c,e</sup> and Mihaela C. Stefan<sup>a,b</sup>*

<sup>a</sup>The Department of Chemistry & Biochemistry and <sup>b</sup>Department of Bioengineering, The University of Texas at Dallas, Richardson, TX, 75080, United States

<sup>c</sup>The Department of Chemical Engineering, <sup>d</sup>Department of Electrical Engineering and <sup>e</sup>Materials Research Institute, The Pennsylvania State University, University Park, PA 16802, United States

## Contents

|                                                                                   |         |
|-----------------------------------------------------------------------------------|---------|
| 1. NMR spectra .....                                                              | S3-S12  |
| 2. MALDI-TOF MS spectra of TP-FBT2T-TP and FP-FBT2T-FP .....                      | S13     |
| 3. GIWAXS spectra of TP-FBT2T-TP and FP-FBT2T-FP before and after annealing ..... | S13-S14 |
| 4. TMAFM images of TP-FBT2T-TP and FP-FBT2T-FP .....                              | S14     |

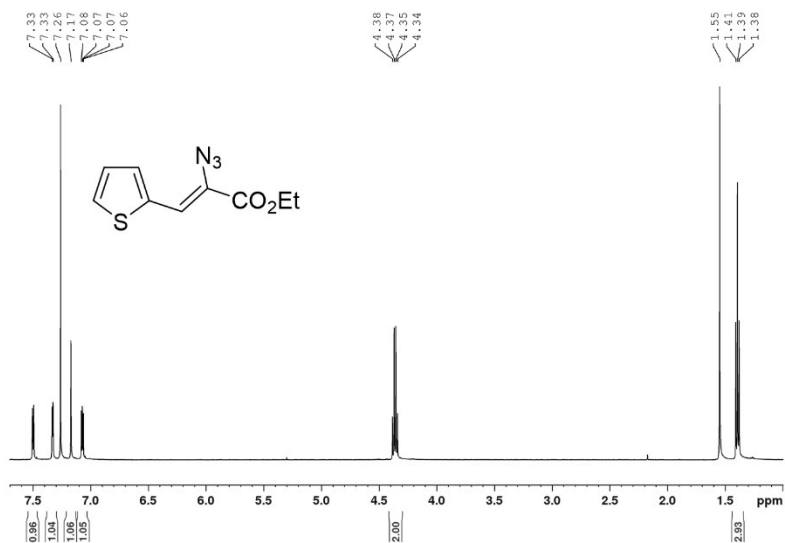

**Fig S1** <sup>1</sup>H NMR spectrum of ethyl-2-azido-3-(thiophen-2-yl)acrylate

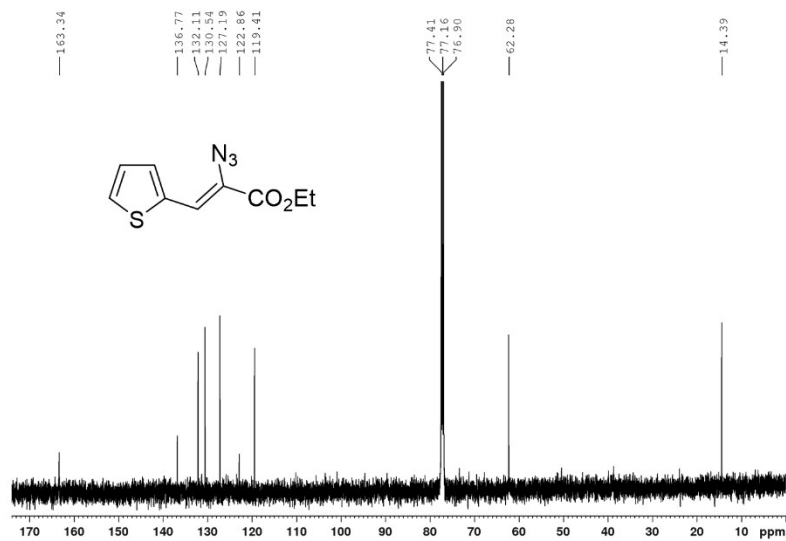

**Fig S2** <sup>13</sup>C NMR spectrum of ethyl-2-azido-3-(thiophen-2-yl)acrylate

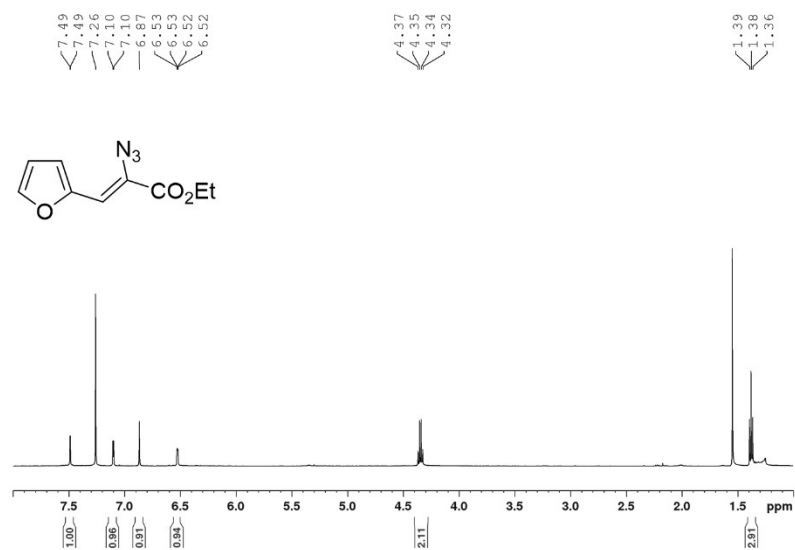

**Fig S3** <sup>1</sup>H NMR spectrum of ethyl-2-azido-3-(furan-2-yl)acrylate

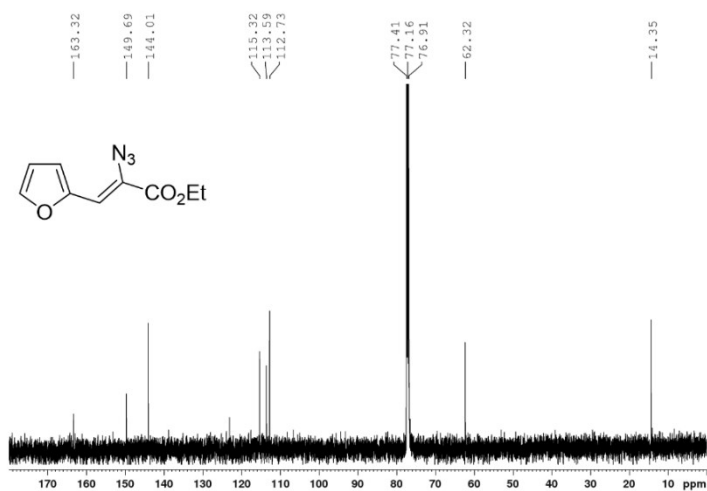

**Fig S4** <sup>13</sup>C NMR spectrum of ethyl-2-azido-3-(furan-2-yl)acrylate

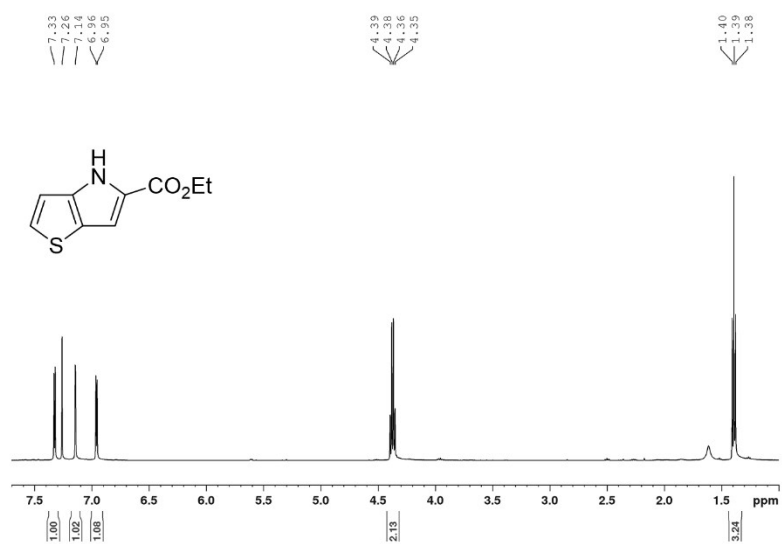

**Fig S5** <sup>1</sup>H NMR spectrum of ethyl 4*H*-thieno[3,2-*b*]pyrrole-5-carboxylate

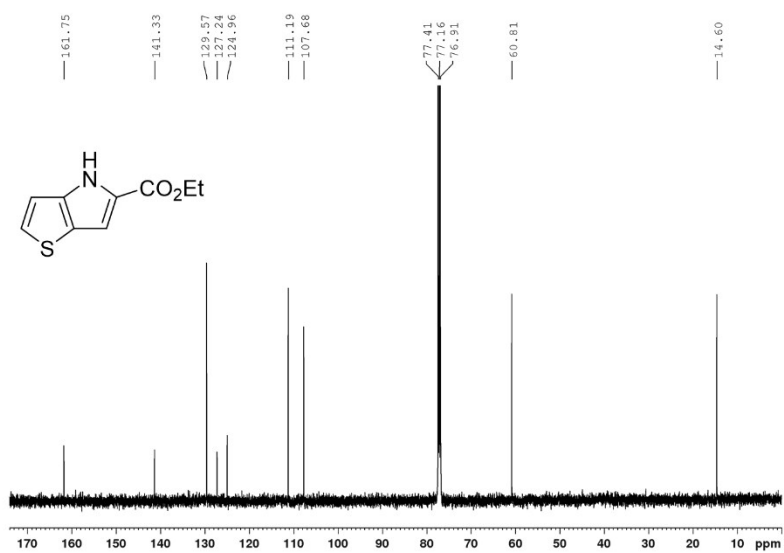

**Fig S6** <sup>13</sup>C NMR spectrum of ethyl 4*H*-thieno[3,2-*b*]pyrrole-5-carboxylate

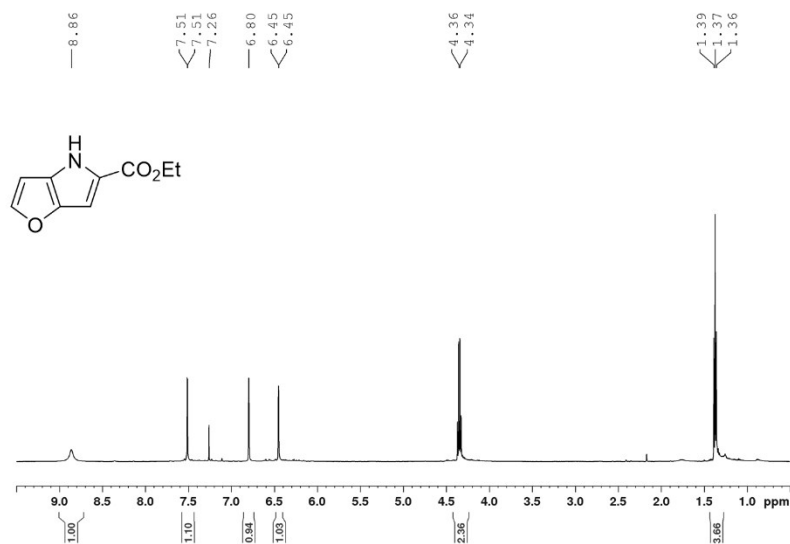

**Fig S7** <sup>1</sup>H NMR spectrum of ethyl 4*H*-furo[3,2-*b*]pyrrole-5-carboxylate

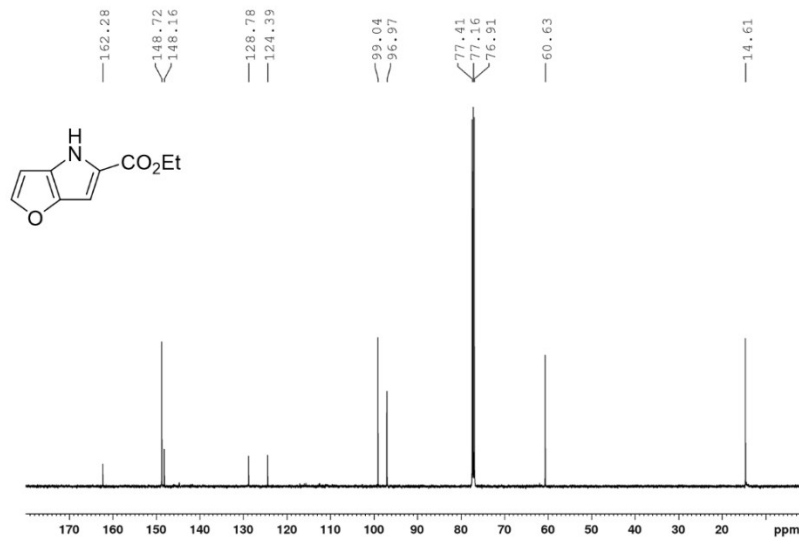

**Fig S8** <sup>13</sup>C NMR spectrum of ethyl 4*H*-furo[3,2-*b*]pyrrole-5-carboxylate

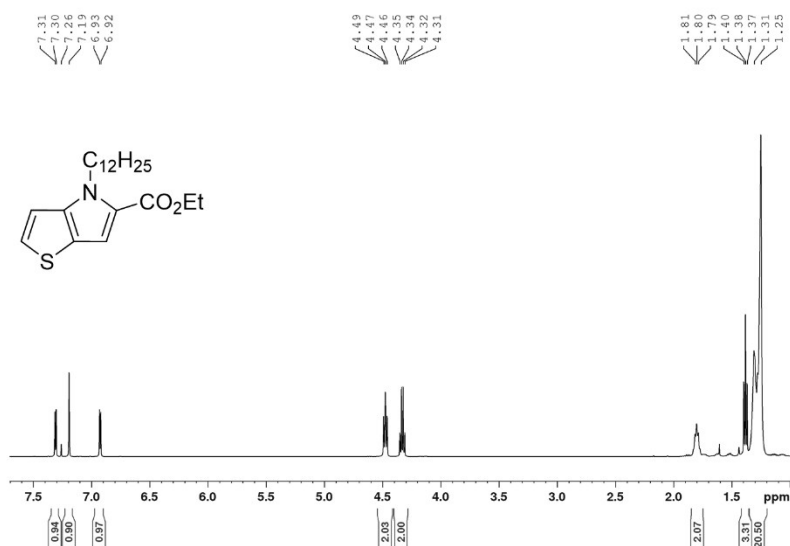

**Fig S9** <sup>1</sup>H NMR spectrum of ethyl 4-dodecyl-4*H*-thieno[3,2-*b*]pyrrole-5-carboxylate

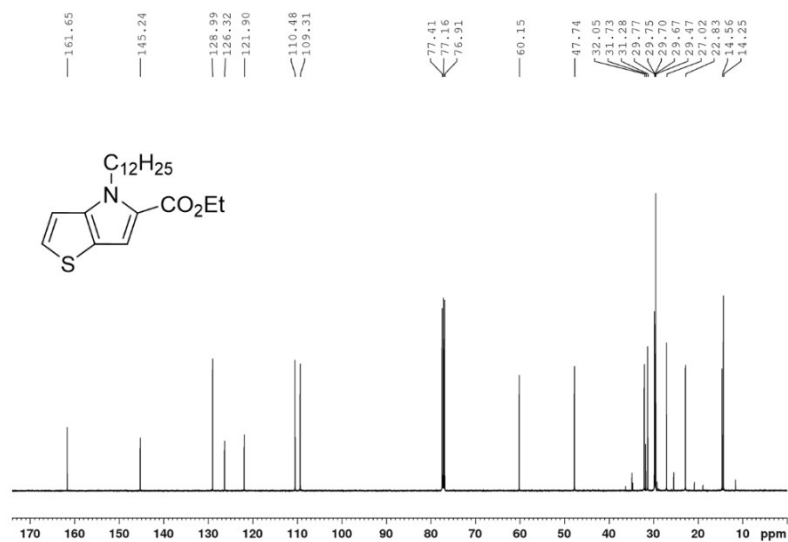

**Fig S10** <sup>13</sup>C NMR spectrum of ethyl 4-dodecyl-4*H*-thieno[3,2-*b*]pyrrole-5-carboxylate

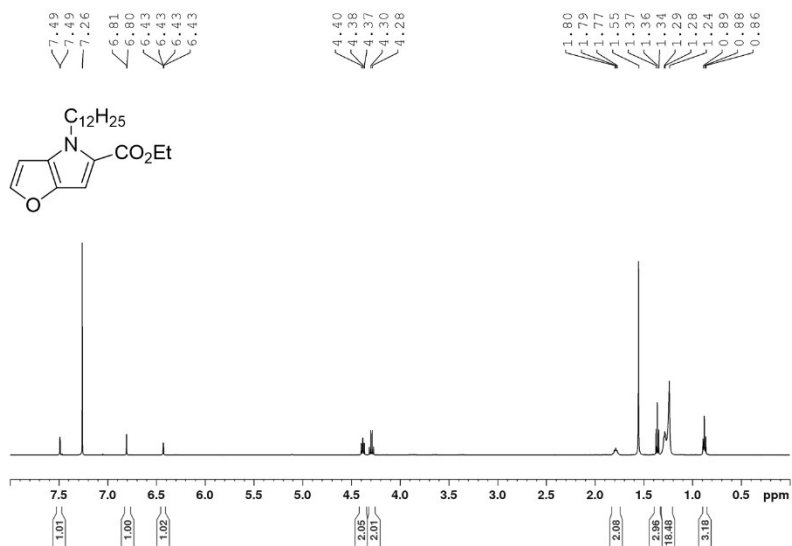

**Fig S11** <sup>1</sup>H NMR spectrum of ethyl 4-dodecyl-4*H*-furo[3,2-*b*]pyrrole-5-carboxylate

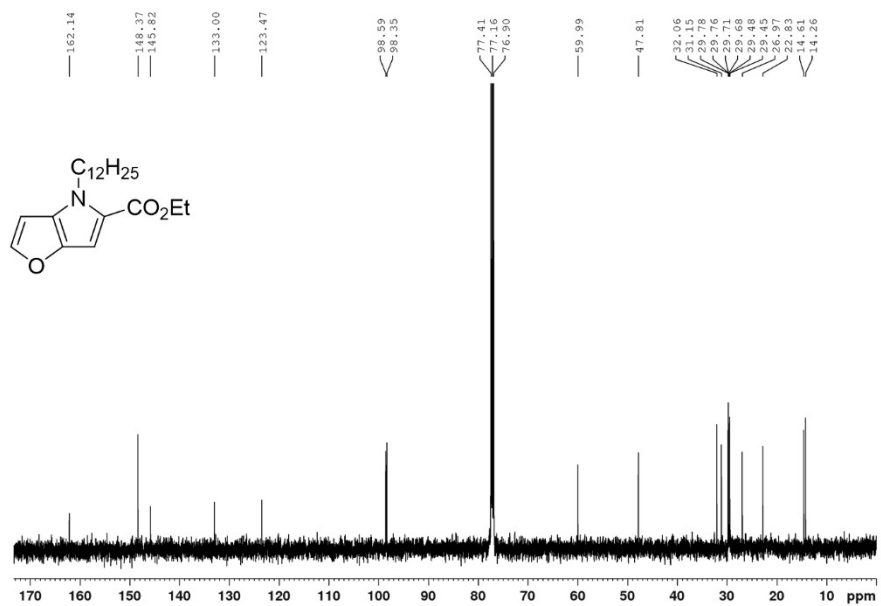

**Fig S12** <sup>13</sup>C NMR spectrum of ethyl 4-dodecyl-4*H*-furo[3,2-*b*]pyrrole-5-carboxylate



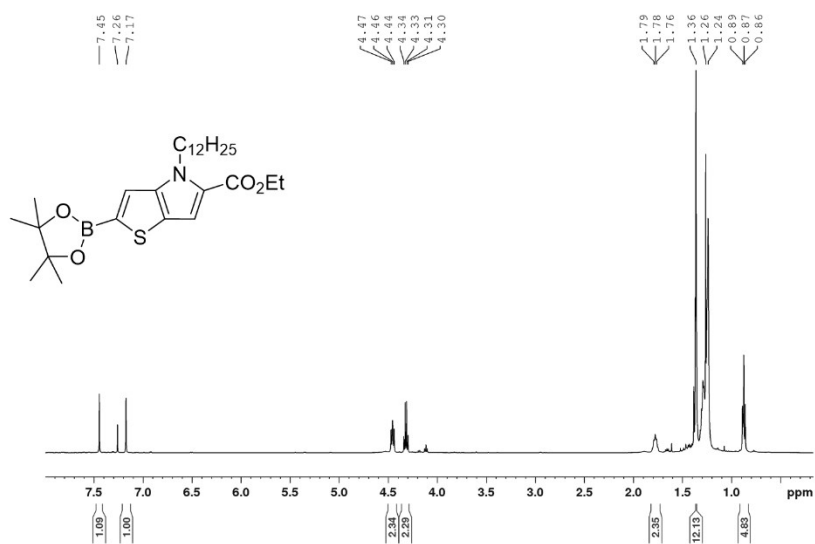

**Fig S13** <sup>1</sup>H NMR spectrum of ethyl 4-dodecyl-2-(4,4,5,5-tetramethyl-1,3,2-dioxaborolan-2-yl)-4*H*-thieno[3,2-*b*]pyrrole-5-carboxylate

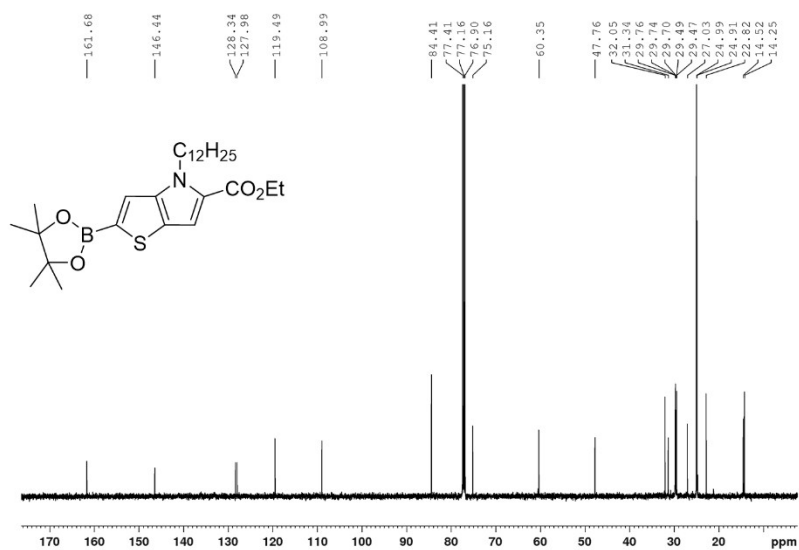

**Fig S14** <sup>13</sup>C NMR spectrum of ethyl 4-dodecyl-2-(4,4,5,5-tetramethyl-1,3,2-dioxaborolan-2-yl)-4*H*-thieno[3,2-*b*]pyrrole-5-carboxylate



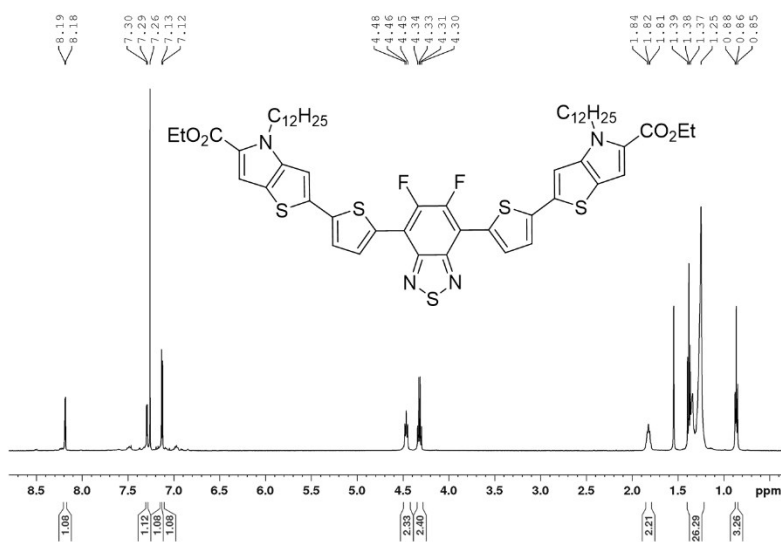

**Fig S17** <sup>1</sup>H NMR spectrum of TP-FBT2T-TP

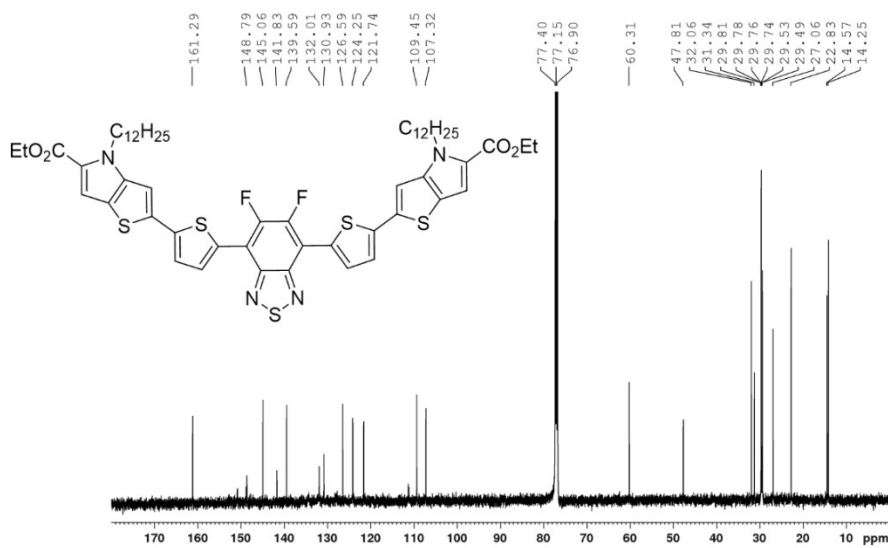

**Fig S18** <sup>13</sup>C NMR spectrum of TP-FBT2T-TP

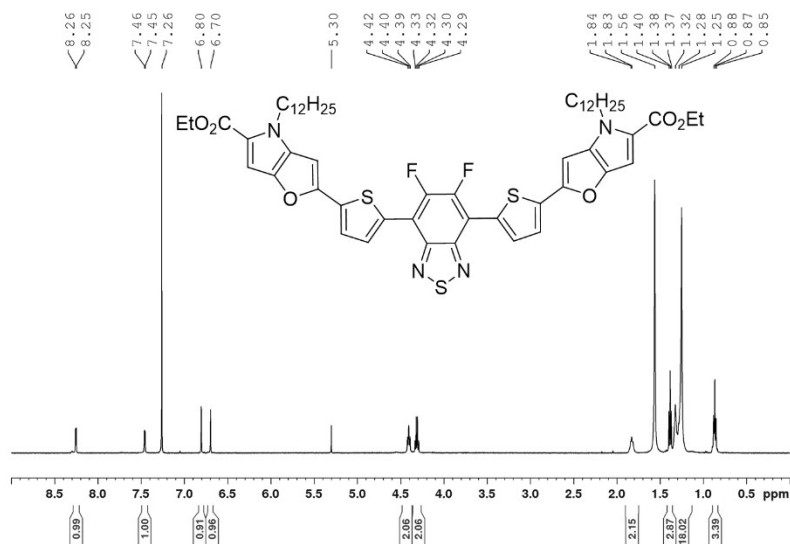

**Fig S19** <sup>1</sup>H NMR spectrum of FP-FBT2T-FP

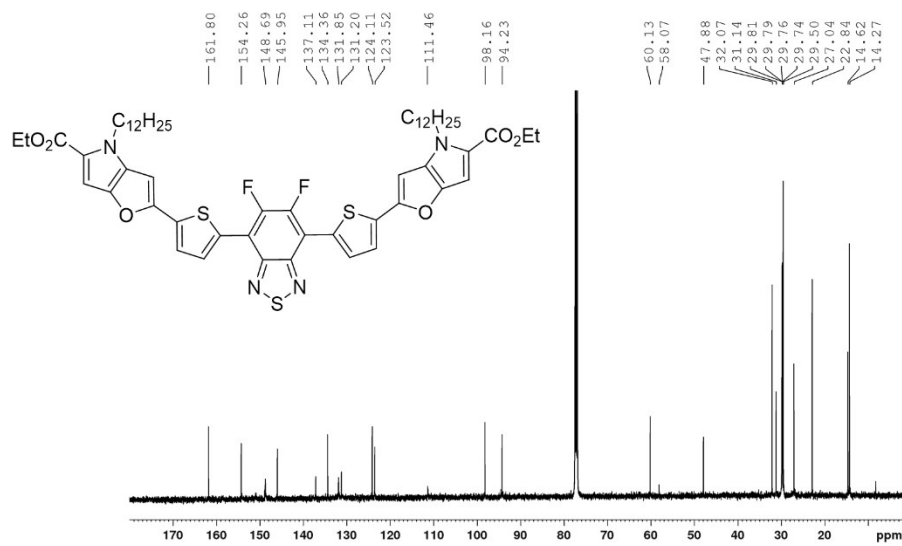

**Fig S20** <sup>13</sup>C NMR spectrum of FP-FBT2T-FP

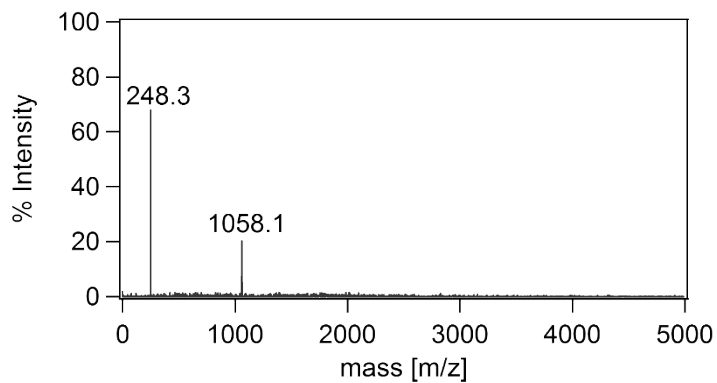

**Fig S21** MALDI-TOF spectrum of **TP-FBT2T-TP**

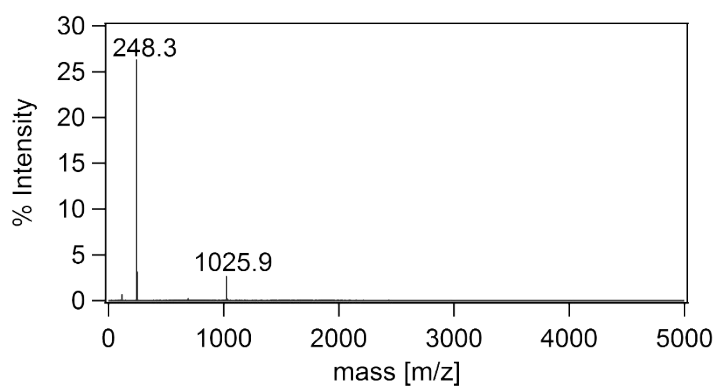

**Fig S22** MALDI-TOF spectrum of **FP-FBT2T-FP**

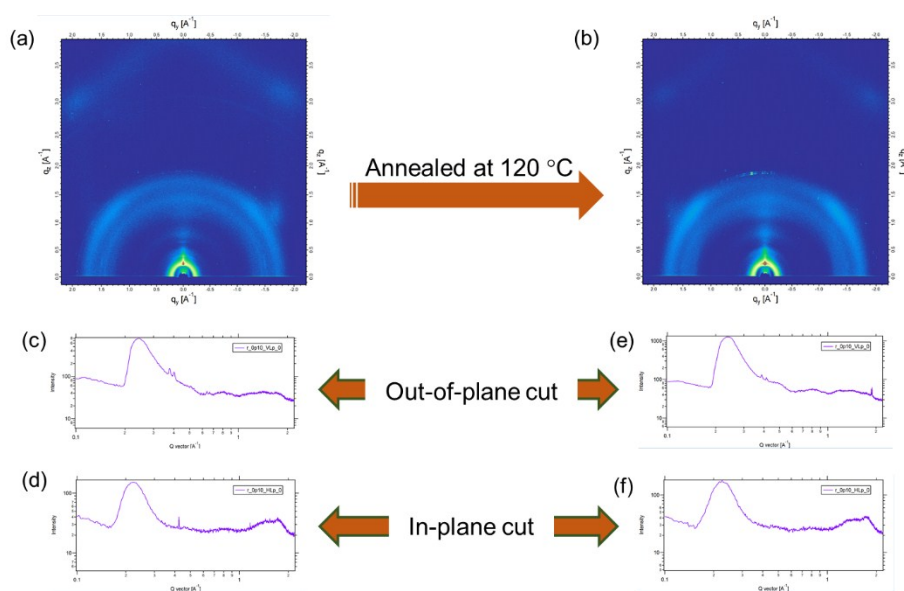

**Fig S23** (a) GIWAXS spectrum, (c) out-of-plane cut, (d) in-plane cut of **TP-FBT2T-TP** film before annealing. (b) GIWAXS spectrum (e) out-of-plane cut, (f) in-plane cut of **TP-FBT2T-TP** film after annealing

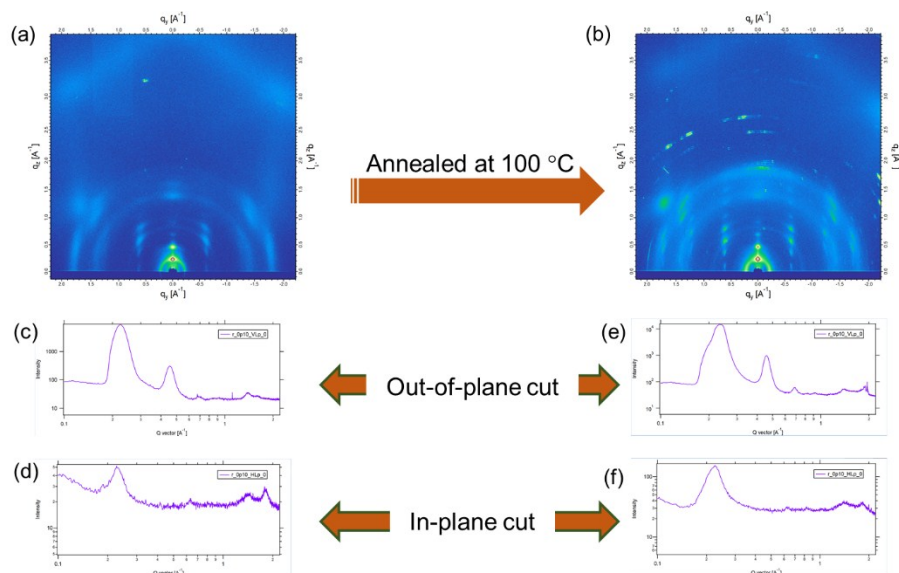

**Fig S24** (a) GIWAXS spectrum, (c) out-of-plane cut, (d) in-plane cut of FP-FBT2T-FP film before annealing. (b) GIWAXS spectrum (e) out-of-plane cut, (f) in-plane cut of FP-FBT2T-FP film after annealing

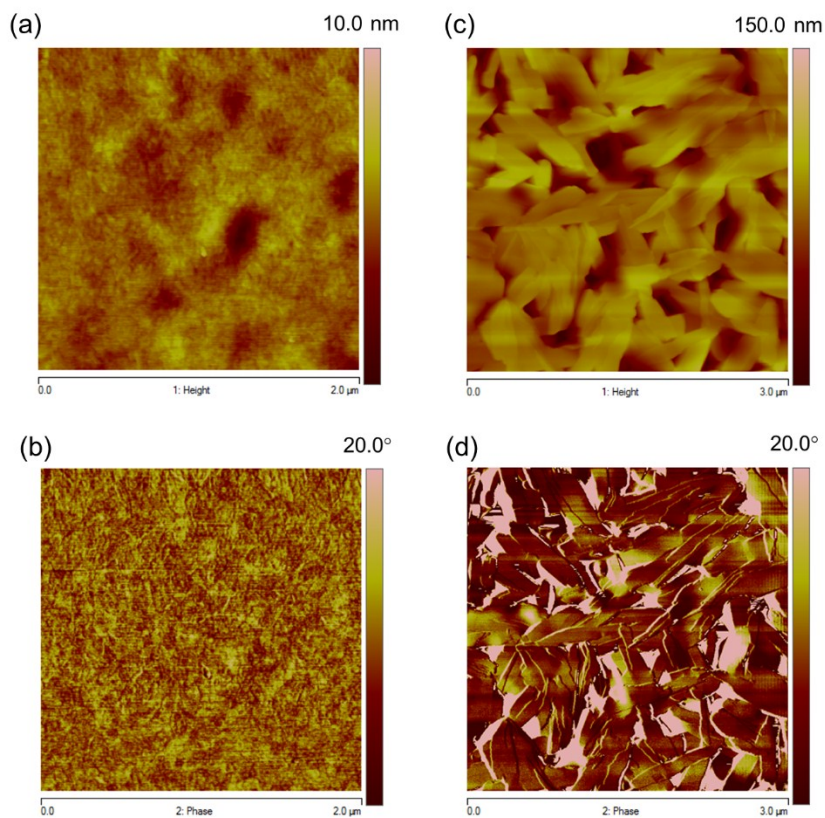

**Fig S25** TMAFM (a) height image, (b) phase image of TP-FBT2T-TP thin film annealed at 120 °C. TMAFM (a) height image, (b) phase image of FP-FBT2T-FP thin film annealed at 100 °C
